# Supplementary material
Source: publisher site journal article supplement (https://www.dovepress.com/article/374635)
Supplement: Supplementary file 1 [file get_supplementary_file.php]

## **Supplementary Data**

**Effectiveness of vortioxetine in patients with major depressive disorder in real-world clinical practice: French cohort results from the global RELIEVE study**

**Supplementary Table S1** Overview of the assessment scales used in the RELIEVE study

| Scale                                                        | Summary                                                                                                                                                                                                                                                                                                                                                                                                                                                                                                                                                                                                                                                                                                                                                                    |
|--------------------------------------------------------------|----------------------------------------------------------------------------------------------------------------------------------------------------------------------------------------------------------------------------------------------------------------------------------------------------------------------------------------------------------------------------------------------------------------------------------------------------------------------------------------------------------------------------------------------------------------------------------------------------------------------------------------------------------------------------------------------------------------------------------------------------------------------------|
| Sheehan Disability Scale (SDS)                               | Well-validated, short, and simple tool widely used for the assessment of functioning in patients with major depressive disorder (MDD). <sup>1,2</sup> This brief self-report measure assesses the degree of functional impairment experienced by the patient over the previous 7 days across the following domains: work/school, family life/home responsibilities, and social life/leisure activities. The level of impairment for each domain is rated using a visual analog scale ranging from 0 (not at all) to 10 (very severe). Scores from the individual domains are combined to generate the SDS total score, ranging from 0 (unimpaired) to 30 (highly impaired). The SDS also reports on work/school days lost and unproductive days during the preceding week. |
| 9-item Patient Health Questionnaire (PHQ-9)                  | Self-administered questionnaire used to assess the severity of depressive symptoms experienced by the patient over the previous 2 weeks. <sup>3</sup> Nine items are scored on a scale from 0 (not at all) to 3 (nearly every day). PHQ-9 total score ranges from 0 to 27; scores of 5, 10, 15, and 20 points represent thresholds for mild, moderate, moderately severe, and severe depressive symptoms, respectively.                                                                                                                                                                                                                                                                                                                                                    |
| Clinical Global Impression–Severity (CGI-S)                  | This clinician-administered scale provides a measure of overall disease severity based on observed and reported symptoms, behavior, and functioning over the past 7 days. Scores range from 1 (normal, not at all ill) to 7 (among the most extremely ill patients). <sup>4,5</sup>                                                                                                                                                                                                                                                                                                                                                                                                                                                                                        |
| 5-item Perceived Deficits Questionnaire-Depression (PDQ-D-5) | A brief 5-item questionnaire for assessment of the severity of self-perceived cognitive symptoms over the previous 7 days in patients with MDD. <sup>6,7</sup> Questions are scored on a scale from 0 to 5, where 0=never, 1=rarely                                                                                                                                                                                                                                                                                                                                                                                                                                                                                                                                        |

---

|                                                      |                                                                                                                                                                                                                                                                                                                                                                                     |
|------------------------------------------------------|-------------------------------------------------------------------------------------------------------------------------------------------------------------------------------------------------------------------------------------------------------------------------------------------------------------------------------------------------------------------------------------|
|                                                      | (once or twice), 2=sometimes (3–5 times), 3=often (daily), and 4=very often (more than once a day). Total score ranges from 0 to 20, with higher scores indicative of more severe cognitive symptoms.                                                                                                                                                                               |
| Digit Symbol Substitution Test (DSST)                | Neuropsychological coding test used to assess various cognitive processes, including visual search, visual-motor coordination, and cognitive flexibility. <sup>8</sup> The number of correct symbols substituted for digits during a 90-second period is recorded. Total score ranges from 0 to 133, with higher scores indicating better cognitive performance.                    |
| Arizona Sexual Experiences Scale (ASEX)              | Self-completed scale for the assessment of sexual functioning across 5 items (sex drive, arousal, vaginal lubrication/penile erection, ability to reach orgasm, and satisfaction from orgasm), each rated 1–6. <sup>9</sup> Total score ranges from 5 to 30, with higher scores indicating greater sexual dysfunction.                                                              |
| EuroQol 5-Dimension 5-Level Questionnaire (EQ-5D-5L) | Self-report instrument covering five health dimensions: mobility, self-care, usual activities, pain/discomfort, and anxiety/depression. <sup>10</sup> Responses (no problems, slight problems, moderate problems, severe problems, and unable to/extreme problems) are used to generate a utility index score (1=indicating perfect health and 0=a state equivalent to being dead). |

---

#### References:

1. Sheehan DV, Harnett-Sheehan K, Raj BA. The measurement of disability. *Int Clin Psychopharmacol*. 1996;11(Suppl 3):89–95. doi: 10.1097/00004850-199606003-00015
2. Sheehan KH, Sheehan DV. Assessing treatment effects in clinical trials with the discan metric of the Sheehan Disability Scale. *Int Clin Psychopharmacol*. 2008;23(2):70–83. doi: 10.1097/YIC.0b013e3282f2b4d6
3. Kroenke K, Spitzer RL, Williams JB. The PHQ-9: validity of a brief depression severity measure. *J Gen Intern Med*. 2001;16(9):606–613. doi: 10.1046/j.1525-1497.2001.016009606.x
4. Guy W, editor. *ECDEU Assessment Manual for Psychopharmacology*. Rockville, MD: US Department of Health, Education, and Welfare (Alcohol, Drug Abuse, and Mental Health Administration); 1976.
5. Busner J, Targum SD. The clinical global impressions scale: applying a research tool in clinical practice. *Psychiatry (Edgmont)*. 2007;4:28–37.

6. Fehnel SE, Forsyth BH, Dibenedetti DB, Danchenko N, François C, Brevig T. Patient-centered assessment of cognitive symptoms of depression. *CNS Spectr.* 2016;21(1):43–52. doi: 10.1017/S1092852913000643
7. Lam RW, Lamy FX, Danchenko N, et al. Psychometric validation of the Perceived Deficits Questionnaire-Depression (PDQ-D) instrument in US and UK respondents with major depressive disorder. *Neuropsychiatr Dis Treat.* 2018;14:2861–2877. doi: 10.2147/NDT.S175188
8. Wechsler D. *Manual for the Wechsler Adult Intelligence Scale—Revised.* New York, NY: Psychological Corporation; 1981.
9. McGahuey CA, Gelenberg AJ, Laukes CA, et al. The Arizona Sexual Experience Scale (ASEX): reliability and validity. *J Sex Marital Ther.* 2000;26(1):25-40. doi: 10.1080/009262300278623
10. EuroQol Research Foundation. *EQ-5D-5L User Guide. Version 3.0.* Rotterdam, The Netherlands: EuroQol Research Foundation; 2019. <https://euroqol.org/publications/user-guides>.
